# Supplementary material for: Elemental Fingerprinting of Mussel Shells to Predict Population Sources and Redistribution Potential in the Gulf of Maine
Source: PLOS journal article supplement (doi:10.1371/journal.pone.0080868), 2013-11-14
Supplement: S4 (10.1371/journal.pone.0080868.s004) [file journal.pone.0080868.s004]

**Appendix S1. Supplementary methods for identification of *Mytilus* congeners from the northernmost HC site using species-specific PCR markers for the female lineage of COI mtDNA.**

**Supplementary methods**

To identify whether specimens were *Mytilus edulis* or *M. trossulus*, DNA was extracted using a Qiagen mini kit following the standard protocol. DNA was amplified from the female mitochondrial Cytochrome oxidase 1 (COI) gene using a PCR protocol developed by Paul Rawson. The following primers were used: CO1Ed1R (CACCTACCCCTTTATCCGTT); CO1Ed1L (TTTGTTTCGGGGCAAGGT); CO1MTR2R CCGTTCTAAAGGACAGTATTAG); CO1MT2L GCAAGGTTGAGGTTAATGAT. PCR was conducted in a 25 µL reaction volume consisting of 1µL DNA, 2.5 µL Promega Go Taq flexi buffer, 1.5 mM MgCl<sub>2</sub>, 15uM each primer, 10mM dNTPs, 0.2 uL Promega hot start TAQ and water. PCR conditions were an initial 2 min denaturation at 94°C followed by 30 cycles of 94°C for 30 sec, 50°C for 30 sec, 72°C for 3 min, and a final extension of 5 min at 72°C. 12uL of PCR product was run out in 4% agarose gel at 75 volts for 120 min. Products from *Mytilus trossulus* were 260 bp; those from *M. edulis* were 280 bp. All PCR reactions contained known *Mytilus* standards previously identified by P. Rawson.
